# Supplementary material
Source: Springer Nature journal article supplement (https://www.springermedizin.de/resource/supplementary/12970_2007_37_MOESM4_ESM.pdf/9594260)

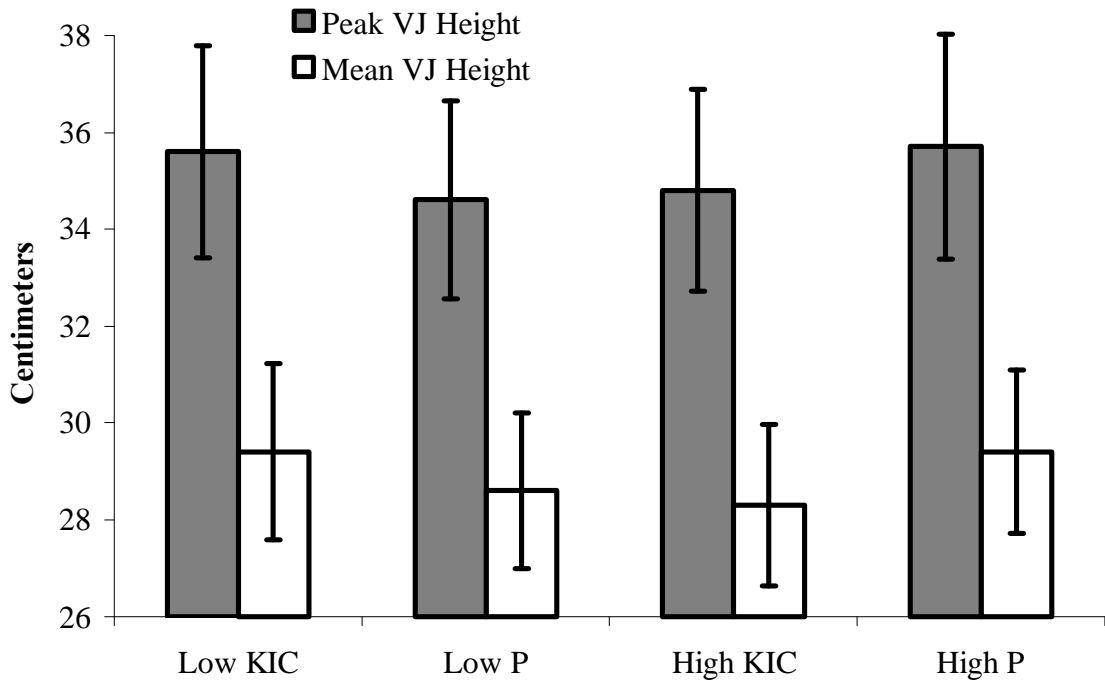

Supplement: MOESM4 [file 9594260]
